# Supplementary material for: Identifying Thresholds for Malnutrition Risk Perception among Community-Dwelling Older Adults: A Cross-Sectional Study Using Latent Profile and Receiver Operating Characteristic Analysis
Source: Research Square preprint supplement (doi:10.21203/rs.3.rs-6581676/v1), 2025-06-25
Supplement: Supplementary file 1 [file 4a167b86f3857767373a2267.docx]

| Dimension | Strongly disgree | Disagree | Neutral | Agree | Strongly agree |
| --- | --- | --- | --- | --- | --- |
| Do you agree that the following symptoms may be warning signs of malnutrition |  |  |  |  |  |
| **Warning Symptoms** |  |  |  |  |  |
| Item1:Unintentional weight loss of more than 2.5 kg within 6 months or more than 5 kg within 1 year. |  |  |  |  |  |
| Item2:Decreased taste, smell, or thirst sensation (such as reduced water intake). |  |  |  |  |  |
| Item3:Having caught a cold three times or more in the past 1-2 months, with difficulty recovering. |  |  |  |  |  |
| Item4:Yellowish or pale skin, significant hair loss (i.e., noticeable thinning, with visible scalp). |  |  |  |  |  |
| Item5:Decreased sleep quality in the past month (e.g., difficulty falling asleep, interrupted sleep, daytime drowsiness, etc.). |  |  |  |  |  |
| Item6:Feeling fatigued or dizzy after light household chores (e.g., wiping tables), walking, or taking a shower. |  |  |  |  |  |
| Do you agree that the following conditions may increase the risk of malnutrition |  |  |  |  |  |
| **Possible Causes** |  |  |  |  |  |
| Item7:Unhealthy eating habits such as picky eating or dieting. |  |  |  |  |  |
| Item8:Unhealthy dietary beliefs, such as "labeling" food (i.e., simply categorizing food as "low-fat," "sugar-free," or "organic"). |  |  |  |  |  |
| Item9:Decline in chewing ability, swallowing ability, or digestive function. |  |  |  |  |  |
| Item10:Poor oral health, including oral pain, multiple missing teeth, wearing dentures, and oral diseases such as periodontitis. |  |  |  |  |  |
| Item11:Suffering from chronic wasting diseases, such as cancer, diabetes, cardiovascular diseases, etc. |  |  |  |  |  |
| Item12:Long-term use of multiple medications (5 or more). |  |  |  |  |  |
| Item13:Short-term stress, such as surgery, radiotherapy and chemotherapy, acute infections, etc. (more than 5 days without nutritional intake). |  |  |  |  |  |
| Item14:Decline in cooking ability (including food preparation, use of kitchen tools, and cooking food). |  |  |  |  |  |
| Item15:Cognitive decline (such as memory loss, difficulty concentrating). |  |  |  |  |  |
| Item16:Living alone and lack of family companionship leading to reduced motivation to eat. |  |  |  |  |  |
| Item17:Lack of social support (e.g., informational support, financial support, health monitoring support, etc.). |  |  |  |  |  |
| Item18: Low mood |  |  |  |  |  |
| Item19:Daily food expenses are focused on saving. |  |  |  |  |  |
| Item20: Lack of nutritional knowledge. |  |  |  |  |  |
| Do you agree that malnutrition may pose the following risks to your physical, psychological, emotional, and social health |  |  |  |  |  |
| **Serious Consequences** |  |  |  |  |  |
| Item21:Leading to other nutrition-related health issues (such as malnutrition-related muscle wasting, vision problems, prolonged hospital stays, increased risk of death, etc.). |  |  |  |  |  |
| Item22:Changes in appearance, reduced satisfaction with body image. |  |  |  |  |  |
| Item23:Increased dependence on community healthcare services. |  |  |  |  |  |
| Item24:Reduced ability for self-health management. |  |  |  |  |  |
| Item25:Increased financial burden on the family. |  |  |  |  |  |
| Item26:Cause distress to family, friends, etc. (care burden, emotions, etc.). |  |  |  |  |  |
| Item27:Feeling frustrated due to the need for others' assistance in caregiving. |  |  |  |  |  |
| Do you agree that the following measures may reduce the risk of malnutrition |  |  |  |  |  |
| **Prevention and management** |  |  |  |  |  |
| Item28:Proactively participate in regular nutritional risk screening organized by community organizations. |  |  |  |  |  |
| Item29:Actively participate in regular nutritional health education activities organized by community healthcare workers (such as nutrition and health knowledge seminars). |  |  |  |  |  |
| Item30:Actively treat the underlying disease. |  |  |  |  |  |
| Item31:Regularly contact community nutritionists for nutritional consultation. |  |  |  |  |  |
| Item32:Use dietary supplements appropriately (e.g., calcium tablets, vitamin C, etc.). |  |  |  |  |  |
| Item33:Maintain a positive emotional state. |  |  |  |  |  |
| Item34:Actively create a pleasant dining atmosphere by dining with family and friends. |  |  |  |  |  |
| Item35:Actively accept the home delivery meal service provided by volunteers from the community canteen. |  |  |  |  |  |
